# Supplementary material for: Facile fabrication of a portable PANI-NFs/c-MWCNT nano-composite electrochemical sensor for gefitinib: application to human plasma
Source: Royal Society of Chemistry journal article supplement (doi:10.1039/d2ay01426b), 2022-01-01

**Table S1.** Effect of different membrane composition and surface modification on the performance of the prepared sensors.

| Sensor no. | Composition |                  |                  |                            |                         | Performance <sup>1</sup>     |                      |                                           |       |        |
|------------|-------------|------------------|------------------|----------------------------|-------------------------|------------------------------|----------------------|-------------------------------------------|-------|--------|
|            | PVC %w/w    | Plasticizer type | Plasticizer %w/w | Ion-exchanger <sup>2</sup> | Thickness $\mu\text{m}$ | Ionophore                    | Surface Modification | Linear range (mol L <sup>-1</sup> )       | Slope | r      |
| 1          | 31.67       | TCP              | 66.67            | TPB                        | 100                     | -                            | PANI                 | $1.0 \times 10^{-2} - 1.2 \times 10^{-4}$ | 26.32 | 0.9948 |
| 2          | 31.67       | TCP              | 66.67            | ARK                        | 100                     | -                            | PANI                 | $1.0 \times 10^{-2} - 1.2 \times 10^{-4}$ | 21.81 | 0.9845 |
| 3          | 31.67       | TCP              | 66.67            | PT                         | 100                     | -                            | PANI                 | $1.0 \times 10^{-2} - 1.2 \times 10^{-4}$ | 22.15 | 0.9735 |
| 4          | 31.67       | TCP              | 66.67            | PM                         | 100                     | -                            | PANI                 | $1.0 \times 10^{-2} - 1.2 \times 10^{-4}$ | 24.66 | 0.9871 |
| 5          | 31.67       | DBP              | 66.67            | TPB                        | 100                     | -                            | PANI                 | $1.0 \times 10^{-2} - 3.7 \times 10^{-4}$ | 24.45 | 0.9943 |
| 6          | 31.67       | NPPE             | 66.67            | TPB                        | 100                     | -                            | PANI                 | $1.0 \times 10^{-2} - 4.1 \times 10^{-5}$ | 26.50 | 0.9926 |
| 7          | 31.67       | NPOE             | 66.67            | TPB                        | 100                     | -                            | PANI                 | $1.0 \times 10^{-2} - 4.1 \times 10^{-5}$ | 26.46 | 0.9951 |
| 8          | 31.67       | DOP              | 66.67            | TPB                        | 100                     | -                            | PANI                 | $1.0 \times 10^{-2} - 1.2 \times 10^{-4}$ | 22.80 | 0.9713 |
| 9          | 31.67       | DBS              | 66.67            | TPB                        | 100                     | -                            | PANI                 | $1.0 \times 10^{-2} - 1.1 \times 10^{-3}$ | 11.08 | 0.9792 |
| 10         | 19.67       | NPPE             | 78.67            | TPB                        | 100                     | -                            | PANI                 | $1.0 \times 10^{-2} - 1.2 \times 10^{-4}$ | 26.47 | 0.9333 |
| 11         | 19.67       | NPOE             | 78.67            | TPB                        | 100                     | -                            | PANI                 | $1.0 \times 10^{-2} - 1.2 \times 10^{-4}$ | 26.93 | 0.9836 |
| 12         | 31.67       | NPOE             | 66.67            | TPB                        | 80                      | -                            | PANI                 | $1.0 \times 10^{-2} - 4.1 \times 10^{-5}$ | 22.75 | 0.9792 |
| 13         | 31.67       | NPOE             | 66.67            | TPB                        | 120                     | -                            | PANI                 | $1.0 \times 10^{-2} - 4.1 \times 10^{-5}$ | 22.27 | 0.9766 |
| 14         | 31.67       | NPOE             | 66.67            | TPB                        | 100                     | CX-8 <sup>3</sup>            | PANI                 | $1.0 \times 10^{-2} - 4.5 \times 10^{-6}$ | 26.16 | 0.9940 |
| 15         | 31.67       | NPOE             | 66.67            | TPB                        | 100                     | $\beta$ -CD <sup>3</sup>     | PANI                 | $1.0 \times 10^{-2} - 1.2 \times 10^{-4}$ | 23.49 | 0.9894 |
| 16         | 31.67       | NPOE             | 66.67            | TPB                        | 100                     | HP- $\beta$ -CD <sup>3</sup> | PANI                 | $1.0 \times 10^{-2} - 1.2 \times 10^{-4}$ | 26.28 | 0.9967 |
| 17         | 31.67       | NPOE             | 66.67            | TPB                        | 100                     | CM- $\beta$ -CD <sup>3</sup> | PANI                 | $1.0 \times 10^{-2} - 1.2 \times 10^{-4}$ | 20.10 | 0.9807 |
| 18         | 31.67       | NPOE             | 66.67            | TPB                        | 100                     | CX-8 <sup>4</sup>            | PANI                 | $1.0 \times 10^{-2} - 4.5 \times 10^{-6}$ | 26.53 | 0.9978 |
| 19         | 31.67       | NPOE             | 66.67            | TPB                        | 100                     | $\beta$ -CD <sup>4</sup>     | PANI                 | $1.0 \times 10^{-2} - 1.2 \times 10^{-4}$ | 24.16 | 0.9950 |
| 20         | 31.67       | NPOE             | 66.67            | TPB                        | 100                     | HP- $\beta$ -CD <sup>4</sup> | PANI                 | $1.0 \times 10^{-2} - 1.2 \times 10^{-4}$ | 26.42 | 0.9969 |

|    |       |      |       |     |     |                              |               |                                           |       |        |
|----|-------|------|-------|-----|-----|------------------------------|---------------|-------------------------------------------|-------|--------|
| 21 | 31.67 | NPOE | 66.67 | TPB | 100 | CM- $\beta$ -CD <sup>4</sup> | PANI          | $1.0 \times 10^{-2} - 1.2 \times 10^{-4}$ | 23.26 | 0.9887 |
| 22 | 31.67 | NPOE | 66.67 | TPB | 100 | CX-8 <sup>4</sup>            | c-MWCNTs      | $1.0 \times 10^{-2} - 4.5 \times 10^{-6}$ | 25.73 | 0.9977 |
| 23 | 31.67 | NPOE | 66.67 | TPB | 100 | CX-8 <sup>4</sup>            | PANI/c-MWCNTs | $1.0 \times 10^{-2} - 1.5 \times 10^{-6}$ | 29.14 | 0.9990 |

<sup>1</sup> Average of three determinations.

<sup>2</sup> Ion-exchanger was used by 1.66 % w/w for all sensors.

<sup>3</sup> Ionophore : ion-exchanger ratio 1:1.

<sup>4</sup> Ionophore : ion-exchanger ratio 2:1.

**Table S2:** Potentiometric selectivity coefficients  $K_{GEF,I}^{Pot}$  of the optimized sensor for different interfering ions.

| Interfering ion              | Selectivity coefficient* $K_{GEF,I}^{Pot}$ |
|------------------------------|--------------------------------------------|
| Na <sup>+</sup>              | $1.2 \times 10^{-2}$                       |
| K <sup>+</sup>               | $1.4 \times 10^{-3}$                       |
| Ca <sup>++</sup>             | $1.5 \times 10^{-3}$                       |
| Ni <sup>++</sup>             | $1.5 \times 10^{-3}$                       |
| Cd <sup>++</sup>             | $1.7 \times 10^{-3}$                       |
| Co <sup>++</sup>             | $1.4 \times 10^{-3}$                       |
| Mn <sup>++</sup>             | $6.8 \times 10^{-3}$                       |
| Mg <sup>++</sup>             | $2.8 \times 10^{-3}$                       |
| Cu <sup>++</sup>             | $7.5 \times 10^{-3}$                       |
| Pb <sup>++</sup>             | $3.0 \times 10^{-3}$                       |
| NH <sub>4</sub> <sup>+</sup> | $3.6 \times 10^{-3}$                       |
| Fe <sup>+++</sup>            | $5.6 \times 10^{-3}$                       |

\* Results are average of three successive measurements.

**Figure S1:** Chemical structure of gefitinib

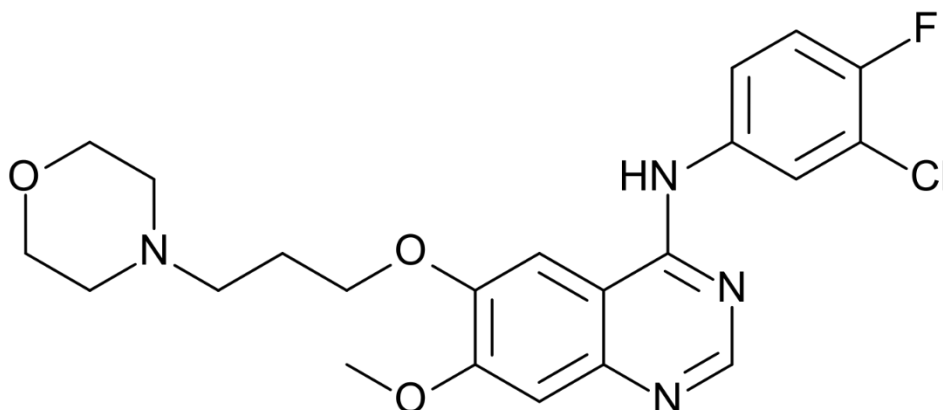

**Figure S2:** Calibration curve for GEF using the optimized sensor (Sensor 23):

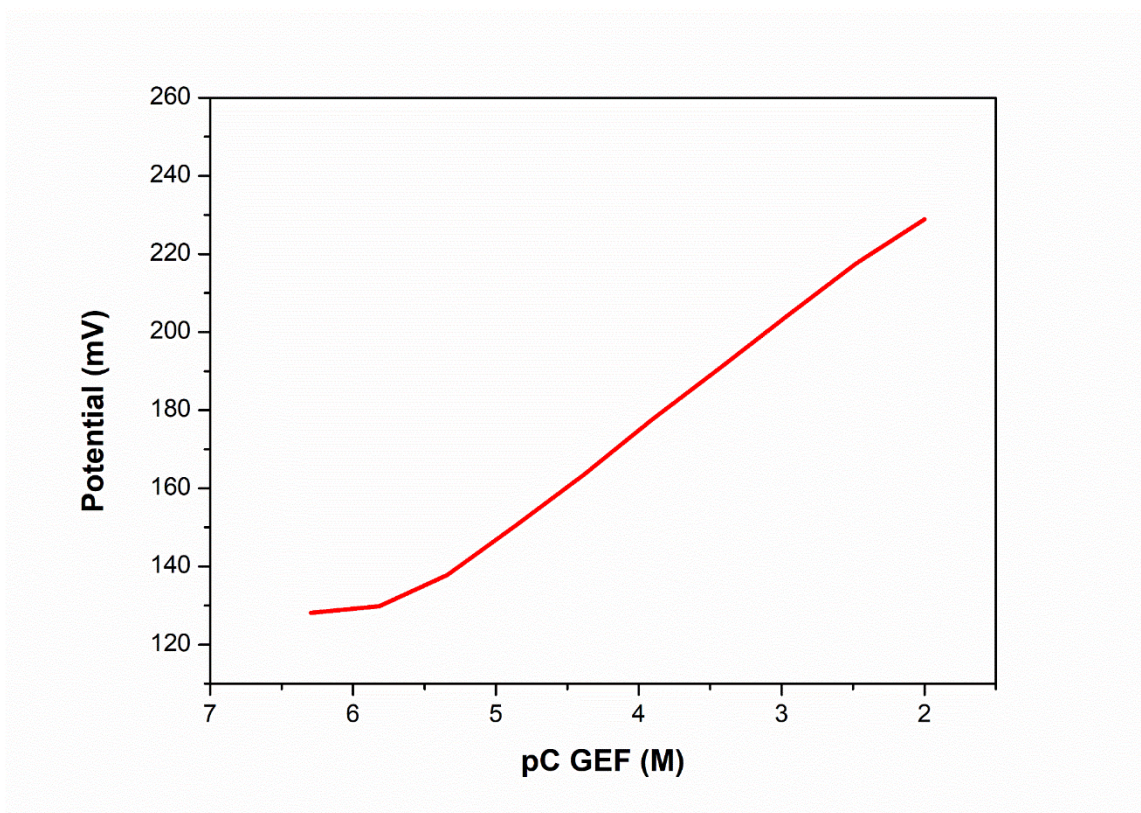

Supplement: d2ay01426b1.pdf [file d2ay01426b1.pdf]
